1 **EVALUATION AND COMPARISON OF THE ANTIOXIDANT AND FREE RADICAL**  
2 **SCAVENGING PROPERTIES OF MEDICINAL PLANTS BY USING THE DPPH**  
3 **ASSAY IN-VITRO**

4 **Short running head:** Antioxidant and radical scavenging properties of medicinal plants

5 **Impacts/ Highlights**

- 6 • Samples in ethanolic extracts showed a higher value of radical scavenging potential.
- 7 • The highest radical scavenging activity was observed in the *Euphrasiae stricta* (IC<sub>50</sub>=  
8 38.972 µg/mL), *Euphorbia platyphyllos* L. (IC<sub>50</sub>= 40.817 µg/mL) and *Epimedium*  
9 *brevicomum* Maxim (IC<sub>50</sub>= 46.265 µg/mL).

10 **Abstract**

11 *Introduction:* Free radicals have been found to cause a number of problems and damage in the  
12 human body especially cardiovascular disorders and cancer. These radiation-based treatments  
13 may have some damaging effects on other normal body cells. So there is a need to explore some  
14 natural means which may contain antioxidants, which can trap the ROS produced within the  
15 living body. *Methods:* In this research, various medicinal plant samples were observed for free  
16 radical hunting or scavenging activity of their methanolic, ethanolic and aqueous extracts by  
17 using the DPPH (1, 1- diphenyl, 2-picryl-hydrazyl) assay in-vitro by taking the absorbance  
18 reading at 517nm using a spectrophotometer, because of flavonoids and other polyphenol  
19 contents, the anti-oxidant activity was possessed by these traditionally used medicinal plants  
20 from Himalayan regions of Pakistan. *Results:* The results showed that all samples in ethanolic  
21 extracts showed a higher value of radical scavenging potential. The highest radical scavenging  
22 activity was observed in the *Euphrasiae stricta* (IC<sub>50</sub>= 38.972 µg/mL), *Euphorbia platyphyllos* L.  
23 (IC<sub>50</sub>= 40.817 µg/mL), and *Epimedium brevicomum* Maxim (IC<sub>50</sub>= 46.265 µg/mL), medicinal  
24 plants for both of their ethanolic and methanolic extracts as compared to the Ascorbic Acid  
25 scavenging activity (IC<sub>50</sub>=37.337 µg/ml). *Conclusion:* These Plants can be efficiently applied as  
26 an important antioxidant source for the treatment and inhibition of widely spread oxidative  
27 stress-related degenerative diseases like cancer, cardiovascular & inflammatory disorders,  
28 atherosclerosis, dementia, diabetes, asthma, and eyes related to degenerative diseases, etc.

29 **Keywords:** free radical, scavenging, antioxidant, medicinal plants, Pakistan

30

31 **Graphical abstract**

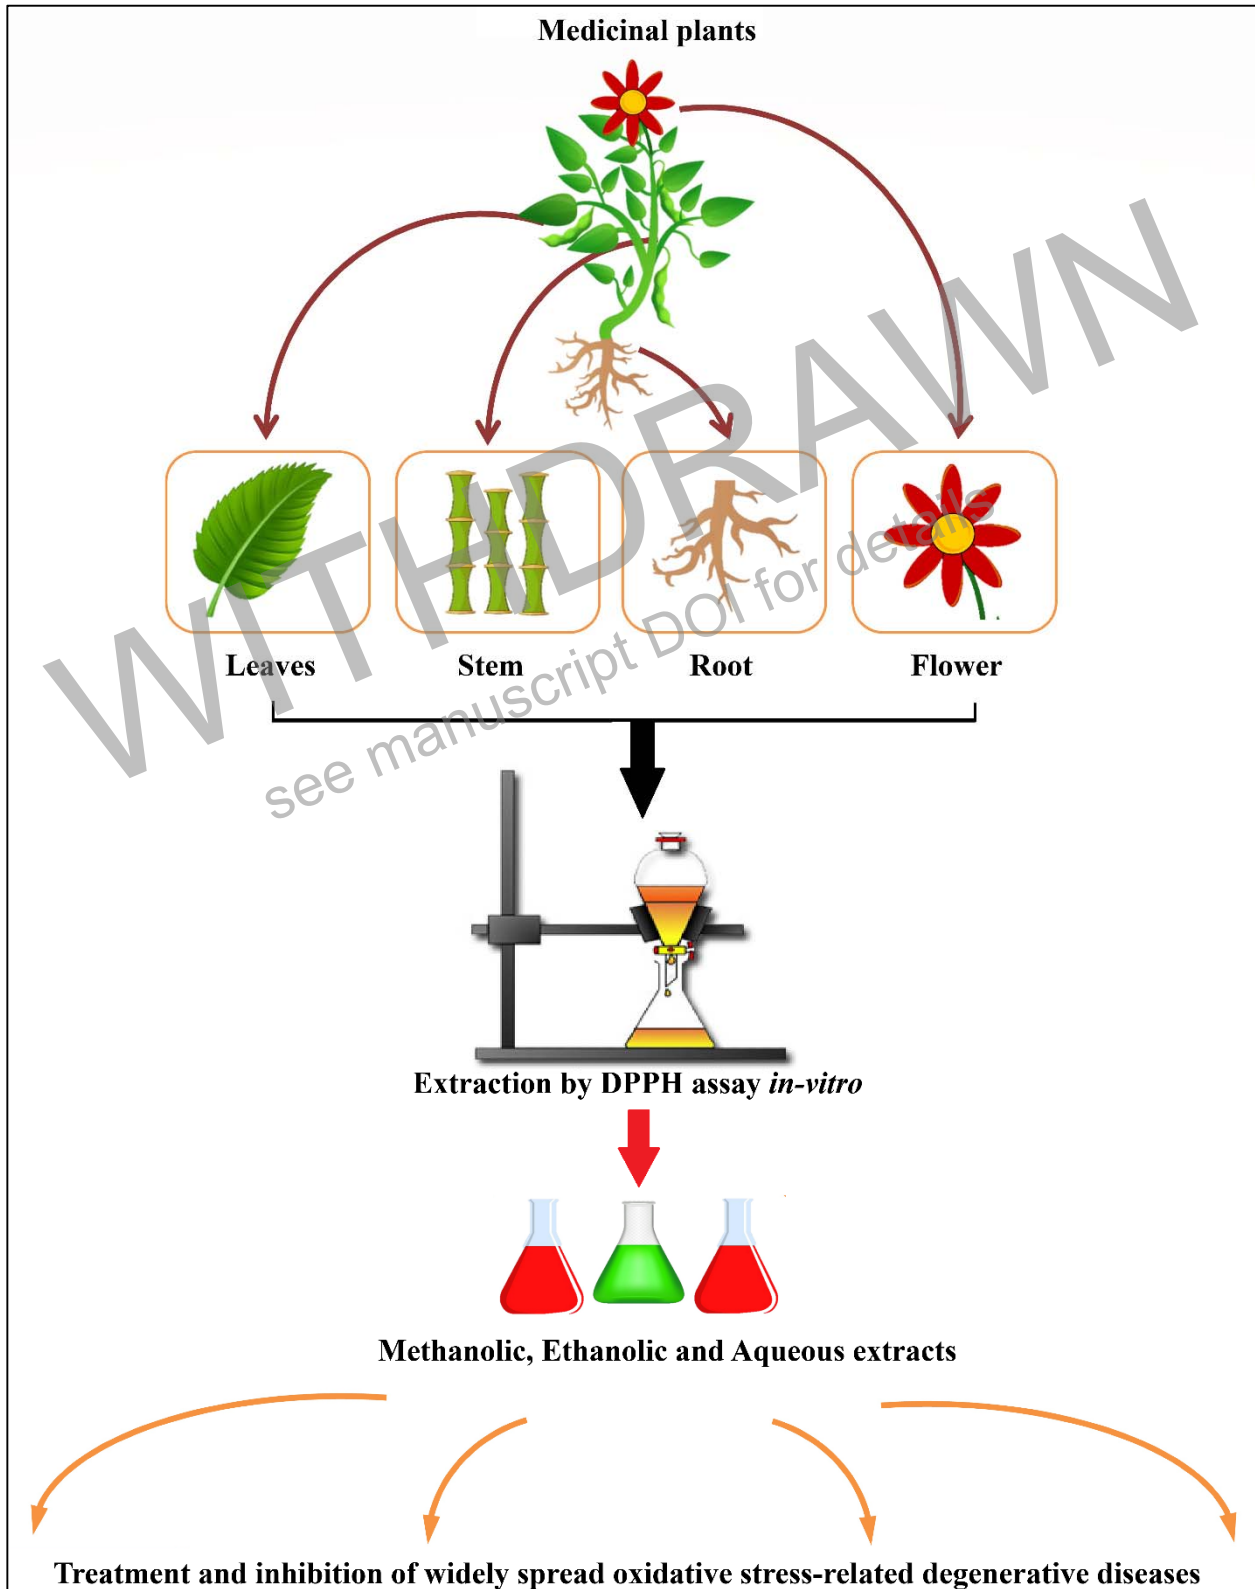

32

33

34

## INTRODUCTION

35 It has been investigated that the reactive oxygen species (ROS) in human body, e.g.,  
36  $H_2O_2$ ,  $O^{2-}$  and  $OH^-$  are found in large amount. These may be primarily because of the reason that  
37 almost 5% or more oxygen ( $O_2$ ) which is inhaled by a human is transformed to these ROS  
38 because of univalence reduction of  $O_2$ .<sup>[1, 2]</sup> Various important diseases such as diabetes, cancer,  
39 cirrhosis, obesity and cardiovascular disorders may be caused by these free radicals.<sup>[3]</sup> So  
40 several enzymatic antioxidant barriers like super oxide dismutase (SOD), glutathione peroxidase  
41 (GPx) and catalase (CAT) have been efficiently used to neutralize these harmful properties of  
42 these free radicals. However, to investigate this oxidative stress, certain factors like ultraviolet  
43 rays, unnecessary NADPH stimulation, and cigarette smoke, environmental  
44 contaminants/pollutants exposure, mitochondrial electron transport chain, radiation, some  
45 parasitic infections or toxic chemicals have been focused and are responsible in causing the  
46 overproduction of the ROS. The oxidative stress is a change in the equilibrium/normal position  
47 of an antioxidant or pro-oxidant processes in a living systems, resulting in the mutilation/harm to  
48 different component like DNA, lipids and membranes proteins and collectively to whole cell  
49 structures.<sup>[4, 5]</sup> So, these diseased condition can be effectively improved by compounds called  
50 antioxidants that can hunt and neutralize the free radicals.<sup>[6]</sup> An extensive diversity of free radical  
51 hunting or antioxidant components like phenols, vitamins, terpenoids and flavonoids have been  
52 found in plants which possess high antioxidant potentials.<sup>[7]</sup> The plant derived polyphenolic  
53 constituents might be more useful *in-vivo* with their positive effects as these are proved to be  
54 more efficient antioxidants as compared to vitamins E or C *in-vitro*.<sup>[8]</sup> Different medicinal plants  
55 had been efficiently applied to treat the ROS and are of great importance having antioxidant  
56 potential because of such sort of alimentary radical scavenging diet supplement. The antioxidant  
57 potentials of medicinal plants are mainly because of rich source of phyto-nutrients and  
58 ingredients like phenols, flavonoids and terpenoids present in them. The antioxidant potentials of  
59 many medicinal plants have been studied<sup>[9, 10]</sup> like anti-cancer and Immunomodulator activity,  
60<sup>[11]</sup> Hepato-protective benefits, hypolipidemic activity<sup>[12]</sup>. Hence, the free radical scavenging  
61 activity by evaluation and comparison of various medicinal plants with different protocols using  
62 spectrophotometer was the main aim of the present study.<sup>[13, 14]</sup>

63

64

## MATERIALS AND METHODS

### Materials

66 The Medicinal plant samples were collected from Himalayan regions of Pakistan and  
67 were identified by Professor Dr. Mohammad Ibrar Shinwari, Chairman Department of  
68 Environmental Sciences, International Islamic University, H-10, Islamabad (IIUI), and Pakistan.  
69 The dried samples were carried out to University of Virginia (UVa), Department of Biology,  
70 USA where the evaluation antioxidant properties of the medicinal plant samples was achieved  
71 under the supervision of Professor Dr. Michael P. Timko. The chemicals, solvents and reagents

72 used in the preparation of plant extracts were Distilled water, Ascorbic acid, DPPH (1, 1-  
73 diphenyl, 2-picryl hydrazyl), Methanol and Ethanol.

WITHDRAWN  
see manuscript DOI for details

Table 1: Traditionally used Medicinal Plants collected from Himalayan regions of Pakistan

| Sr. No. | Scientific Name                | Plant Pictures                                                                      | Local Name                     | Family     | Parts Used          | Traditional Medicinal Uses                                                   |
|---------|--------------------------------|-------------------------------------------------------------------------------------|--------------------------------|------------|---------------------|------------------------------------------------------------------------------|
| 1.      | <i>Trifolium repense</i> L.    |    | White Clover, Desi siree, Saag | Fabaceae   | Leaves              | Stomach problems, Anti-intestinal helminthic worms, Anti-cestodal properties |
| 2.      | <i>Cassia tora</i> Linn        |    | Kikkar, Cassias                | Fabaceae   | Leaves, Seeds       | Phyto-chemical and Pharmacological Properties                                |
| 3.      | <i>Psoralea corylifolia</i> L. |    | Babchi or Bakochi              | Fabaceae   | Leaves, Seeds       | Antibacterial, antitumor, anti-inflammatory and immunomodulatory activity.   |
| 4.      | <i>Urticae folium</i>          |   | Nettles or Stinging nettles,   | Urticaceae | Seeds, Leaves       | Antimicrobial, antiulcer and analgesic activities                            |
| 5.      | <i>Teraxaci folium</i>         |  | Dandelion                      | Asteraceae | Whole Plant Extract | Anti-inflammatory, anti-carcinogenic and antioxidative activities            |

|     |                                    |                                                                                     |                                                                          |                |                                      |                                                                                                                                                           |
|-----|------------------------------------|-------------------------------------------------------------------------------------|--------------------------------------------------------------------------|----------------|--------------------------------------|-----------------------------------------------------------------------------------------------------------------------------------------------------------|
| 6.  | <i>Rubi idaei folium</i>           |    | Akhriyar, Jamaro                                                         | Phragmidiaceae | Fruits, leaves                       | Antimicrobial properties                                                                                                                                  |
| 7.  | <i>Rhus potaninii</i><br>Maxim     |    | Desi drawa, Tunn                                                         | Anacardiaceae  | Fruits, leaves                       | Anti- hypertension to control high BP, Anti-diabetic properties                                                                                           |
| 8.  | <i>Lantana camara</i>              |    | Big-sage,<br>wild-sage, red- sage,<br>white-sage,<br>tick-berry          | Verbenaceae    | Whole Plant<br>Extracts              | Antimicrobial, fungicidal,<br>insecticidal, Anti- cancer,<br>skin itches, leprosy, rabies,<br>chicken- pox, measles, asthma<br>and anti-ulcer properties. |
| 9.  | <i>Lonicera japonica</i><br>Thunb. |   | Chanbha. Japanese<br>honeysuckle and<br>golden and silver<br>honeysuckle | Caprifoliaceae | Dried leaves,<br>Stem and<br>flowers | Anti-inflammatory, to treat<br>fever, headache, cough,<br>thirst, and sore throat                                                                         |
| 10. | <i>Epilobii herba</i>              |  | Willowherbs                                                              | Onagraceae     | Whole Plant<br>Extracts              | Used for prostate hyperplasia<br>(BPH), bladder and hormone<br>disorders                                                                                  |



|     |                               |                                                                                     |                                                    |               |                     |                                                                                                                  |
|-----|-------------------------------|-------------------------------------------------------------------------------------|----------------------------------------------------|---------------|---------------------|------------------------------------------------------------------------------------------------------------------|
| 11. | <i>Thymus serpyllum</i> L.    |    | Breckland thyme, Breckland wild and creeping thyme | Lamiaceae     | Aerial Parts        | Antimicrobial, treating fever and antitumor activity                                                             |
| 12. | <i>Salvia officinalis</i>     |    | Garden sage, common sage, or culinary sage         | Lamiaceae     | Whole Plant Extract | Treating Alzheimer's Disease as neurotoxic                                                                       |
| 13. | <i>Euphrasiae herba</i>       |    | Eyebright                                          | Orobanchaceae | Whole Plant Extract | For eyestrain and to relieve inflammation caused by colds, coughs, sinus infections, sore throats and hay fever. |
| 14. | <i>Equiseti herba</i>         |    | Horsetail, snake grass, puzzle grass               | Equisetaceae  | Aerial parts        | Antimicrobial and Genotoxicity                                                                                   |
| 15. | <i>Millefolii herba</i>       |   | Yarrow or common yarrow                            | Asteraceae    | Leaves, Flowers     | Antimicrobial Activity                                                                                           |
| 16. | <i>Mentha piperita</i> folium |  | Wild Mint                                          | Lamiaceae     | Whole Plant Extract | Antimicrobial Activity                                                                                           |

|     |                                  |                                                                                     |                                             |               |                     |                                                                          |
|-----|----------------------------------|-------------------------------------------------------------------------------------|---------------------------------------------|---------------|---------------------|--------------------------------------------------------------------------|
| 17. | <i>Euphorbia platyphyllos</i> L. |    | Dhoodal                                     | Euphorbiaceae | Aerial parts        | Cytotoxic and apoptotic activities                                       |
| 18. | <i>Marrubium vulgare</i>         |    | White horehound                             | Lamiaceae     | Aerial parts        | Treating stomach problems                                                |
| 19. | <i>Melissae folium</i>           |    | Lemon Balm, balm, common balm, or balm mint | Lamiaceae     | Whole Plant Extract | Antimicrobial Activities                                                 |
| 20  | <i>Hederae folium</i>            |    | Jal bail                                    | Araliaceae    | Leaves, Fruit       | Antimicro, Antioxidative, hepato-protective and Antimutagenic activities |
| 21  | <i>Fritillaria thunbergii</i>    |   | Lilly                                       | Liliaceae     | Whole Plant Extract | Antimicrobial activities                                                 |
| 22  | <i>Satureja montana</i>          |  | Mountain savory, winter savory              | Lamiaceae     | Whole Plant Extract | Antimicrobial activities                                                 |



|    |                                      |                                                                                     |                                                                  |                |                        |                                                                 |
|----|--------------------------------------|-------------------------------------------------------------------------------------|------------------------------------------------------------------|----------------|------------------------|-----------------------------------------------------------------|
| 23 | <i>Gunnera perperna</i>              |    | River pumpkin, wild rhubarb, wild ramenas, Nalcas.               | Gunneraceae    | Stem, Leaves           | Anti-microbial, anti-inflammatory and anti-oxidative properties |
| 24 | <i>Absinthii herba</i>               |    | Absinthe, Absinthim, absinthe wormwood, grand wormwood, wormwood | Asteraceae     | Stalk, Leaves          | Antidepressant and Antioxidant activities                       |
| 25 | <i>Viscum album</i>                  |    | Mistletoe                                                        | Santalaceae    | Leaves, fruit, Stalk   | Antihyperglycemic activity                                      |
| 26 | <i>Asperula Herba</i>                |    | Woodruff, Golden rod                                             | Rubiaceae      | Leaves, stalk, Flowers | Antibacterial activities                                        |
| 27 | <i>Tephrosia purpurea</i> L.         |   | Sarphonk, Sharpunkha, Fish poison, Wild indigo                   | Fabaceae       | Leaves                 | Anticarcinogenic and Anti-lipid peroxidative effects            |
| 28 | <i>Tinospora cordifolia</i> (Willd.) |  | Heart-leaved moonseed, guduchi and giloy                         | Menispermaceae | Leaves                 | Anti-bacterial, Antifungal Properties                           |

|    |                          |                                                                                     |                                                                            |            |                |                                                          |
|----|--------------------------|-------------------------------------------------------------------------------------|----------------------------------------------------------------------------|------------|----------------|----------------------------------------------------------|
| 29 | <i>Ocimum basilicum</i>  |    | Basil, sweet basil                                                         | Lamiaceae  | Leaves         | Antioxidant and anticancer Properties                    |
| 30 | <i>Saussurea lappa</i>   |    | Costus or kuth                                                             | Asteraceae | Whole Plant    | For stomach problems                                     |
| 31 | <i>Betulae folium</i>    |    | Silver birch, warty birch, European white birch, or East Asian white birch | Betulaceae | Bark, Leaves   | Anti-inflammatory, antiviral and anti-cancer properties. |
| 32 | <i>Cantaurii herba</i>   |    | Centaury, Centory, Starthistles, knapweeds, Centaureas                     | Asteraceae | Whole Plant    | Cytotoxic, antifungal and antimicrobial properties       |
| 33 | <i>Prunella vulgaris</i> |   | Common self-heal, woundwort, carpenter's herb, brown-wort and blue curls   | Lamiaceae  | Leaves, Flower | Cytotoxic and immunomodulatory activities                |
| 34 | <i>Echter ehrenpreis</i> |  | Speedwell, Common Gypsy-weed                                               | Veroniceae | Whole Plant    | Antimicrobial Properties                                 |

|    |                               |                                                                                     |                                                                       |               |                     |                                                           |
|----|-------------------------------|-------------------------------------------------------------------------------------|-----------------------------------------------------------------------|---------------|---------------------|-----------------------------------------------------------|
| 35 | <i>Paris polyphilla</i>       |    | Love Apple, Satuwa                                                    | Melanthiaceae | Leaves              | Antimicrobial Properties                                  |
| 36 | <i>Melissa officinalis</i> L. |    | Lemon balm, balm, common balm, or balm mint                           | Lamiaceae     | Leaves, Stalk       | Genotoxicity and cytotoxicity                             |
| 37 | <i>Hedyotis diffusa</i>       |    | White flower, snake-tongue grass.                                     | Rubiaceae     | Whole Plant Extract | Anti-inflammatory, cytotoxic and Antibacterial activities |
| 38 | <i>Polygonum aviculare</i>    |   | Common knotgrass, Prostrate knotweed, Bird-weed pigweed and low-grass | Polygonaceae  | Leaves, Stalk       | Antimicrobial and Anti-inflammatory Properties            |
| 39 | <i>Salviae off. folium</i>    |  | Sage, also called garden sage, common sage, culinary sage.            | Lamiaceae     | Aerial parts        | Cytotoxic Properties                                      |

|    |                          |                                                                                   |                              |              |              |                                                 |
|----|--------------------------|-----------------------------------------------------------------------------------|------------------------------|--------------|--------------|-------------------------------------------------|
| 40 | <i>Fagopyrum cymosum</i> |  | Buckwheat, Tartary buckwheat | Polygonaceae | Aerial Parts | Anti-inflammatory also to treat fever, headache |
|----|--------------------------|-----------------------------------------------------------------------------------|------------------------------|--------------|--------------|-------------------------------------------------|

WITHDRAWN  
see manuscript DOI for details

## **Methodology: Preparation of Medicinal Plant Extracts**

For preparing the methanolic extracts, 100 mg of dried powdered plant leaf samples were taken in 1.5ml of aqueous Methanol (40%) in Eppendorf tubes. The samples were shaken well to dissolve to greater extent with the help of stirrer/shaker. All samples were then incubated in dark for 24 hours. The extracts were then filtered to remove undissolved solid particles in form of pellet and the supernatant was obtained for further analysis.

## **Preparation of 1mM DPPH solution**

For preparing 1mM of DPPH solution, 3.94mg of DPPH was added in 100 ml methanol in a 200 mL flask and was well mixed with the help of stirrer. DPPH gave purple color when dissolved in Methanol. The incubation was then done at room temperature for 20 min. The series of dilution were made for less concentrated DPPH solution, as highly concentrated solution does not give accurate absorbance value by blocking most of light in spectrophotometer. Different concentrations of plant extracts (5 µg, 25µg, 50µg, 75µg and 100 µg) were added in diluted DPPH solution. The samples were kept in incubation for 30 min in dark again. The purple color of DPPH in Methanol solution was faded or completely disappeared because of the activity of antioxidants from medicinal plant samples. The free radical hunting or scavenging activity was measured by taking the absorbance reading of samples at 517 nm on spectrophotometer.

The methanol, as the basic and the DPPH were used as a blank and negative control respectively. Ascorbic Acid was taken as standard because of its high Antioxidant activity. The increased absorbance indicated the high antioxidant activity of samples. The formula used to calculate the reduction %age was,

$$\% \text{age reduction} = \frac{A_c - A_s}{A_c} * 100$$

## **Preparation of Ascorbic Acid Stock solution**

To prepare the standard Ascorbic Acid stock standard solution, 0.5mg of Ascorbic Acid was mixed in 1 mL of Methanol.

## **Ascorbic Acid Curve graph**

The %age reduction in absorbance was observed using different concentration of Ascorbic Acid in sample solution to construct an Ascorbic Acid curve. The Eppendorf tubes were taken with 40µL of DPPH in 1.5 mL of Methanol by mixing it well on stirrer. The initial absorbance reading was taken at 517nm.

The preparation of Ascorbic Acid solution (standard) was done by dissolving the 0.5mg/mL of Ascorbic acid in 1mL of methanol. To measure the absorbance difference, different ranges of this solution i.e., (10-100 µL), were added to DPPH sample solution. The DPPH reagent solution was taken as a control in separate Eppendorf tubes. The absorbance value of the samples was then measured at 517nm, after 5 minutes of incubation at room temperature using spectrophotometer.



The %age reduction/inhibition was calculated by using following formulae,

$$\%age\ Inhibition = \frac{Ac - As}{Ac} * 100$$

In this formula Ac=Absorbance of control and As=Absorbance of Sample

A graph was plotted between “%age Absorbance inhibition vs Concentration”. The IC<sub>50</sub> for Ascorbic Acid and plant samples was also calculated.

### IC<sub>50</sub> value

The Inhibition concentration or IC<sub>50</sub> is the value which shows the half or 50% inhibition or reduction in initial absorbance by an antioxidant in DPPH Assay. It was calculated by plotting different concentration of extracts and by reading their % inhibition/reduction. The lower IC<sub>50</sub> indicated the antioxidant potential of the sample.

### Calculation of IC<sub>50</sub> value in Antioxidant assays.

It was a simple calculation consisting of following steps;

A scattered graph was made in excel (where X axis was taken as concentration and Y axis as %age Inhibition activity)

The slope equation used was (Y=mx+c or Y=mx-c)

Where the value of “Y” in IC<sub>50</sub> equation was Y=50 or (0.5) as it means the half or 50% inhibition/reduction in absorbance of samples.

In next step, the IC<sub>50</sub> of methanolic, ethanolic and aqueous extracts of all medicinal plant samples was also measured following same DPPH protocol for methanol (2 mg/ml), 0.5 mg/mL of ethanol and water (2 mg/mL) with the addition of increasing concentration i.e., methanol (5-100 µl), Ethanol (10-50 µl) and water (5-100 µl) in methanol and DPPH reagent solution in already prepared Eppendorf tubes.

Table 2: Reduction in the percentage of DPPH absorbance values of samples at 517 nm with the addition of Ascorbic Acid.

| Sr. No. | Concentration (ug/mL) | Absorbance | %age Inhibition | IC <sub>50</sub> (ug/mL) | R <sup>2</sup> |
|---------|-----------------------|------------|-----------------|--------------------------|----------------|
| 1       | 10                    | 0.944      | 34.4459         |                          |                |
| 2       | 20                    | 0.884      | 38.623924       |                          |                |
| 3       | 30                    | 0.752      | 47.7789         |                          |                |
| 4       | 40                    | 0.691      | 52.1149         |                          |                |
| 5       | 50                    | 0.616      | 57.22334        | 37.337                   | 0.989          |
| 6       | 60                    | 0.575      | 60.0695         |                          |                |
| 7       | 70                    | 0.426      | 70.417          |                          |                |
| 8       | 80                    | 0.394      | 72.69987        |                          |                |

|                         |     |             |        |  |  |
|-------------------------|-----|-------------|--------|--|--|
| 9                       | 90  | 0.242       | 83.195 |  |  |
| 10                      | 100 | 0.198       | 86.25  |  |  |
| <b>Blank (Methanol)</b> |     | <b>1.44</b> |        |  |  |

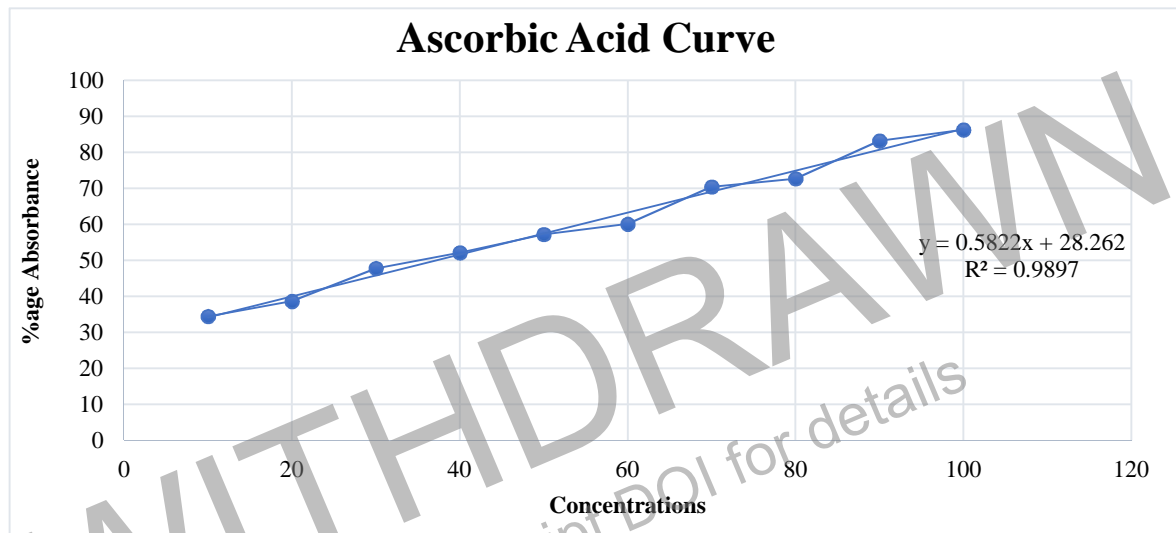

Figure 1: Graphical presentation of Ascorbic Acid Absorbance at 517nm.

## RESULTS AND DISCUSSION

The DPPH solution was used in this experiment because it is never affected by some side reactions, like enzymatic suppression or metal ion chelation, comparing with the other free radicals like superoxide oxides and hydroxyl ions. The deep purple color was shown by freshly prepared DPPH solution with maximum absorbance at 517nm. The purple color of DPPH was faded up or almost disappeared because of the antioxidants activity present in these plant extracts. Therefore, the free radicals in DPPH can be neutralized by antioxidant molecules (i.e., by providing hydrogen atoms or donating electrons, possibly through an attack on the free radicals present in DPPH molecule) and thus resulting in purple to colorless change in color (e.g., by converting to 2, 2-diphenyl-1-hydrazine, or by replacing corresponding hydrazine molecule), which showed increase in the absorbance at 517nm. This DPPH Assay is also very useful as the increase in absorbance of the sample solution can be directly measured by a continuous spectrophotometry in the reaction medium at any time. The consistent information regarding the antioxidant potential of these tested plant samples has been efficiently measured using DPPH assay <sup>[15, 16]</sup>.

In this research, the ethanolic, methanol and aqueous plant extracts of 40 medicinal plants were experimented to test their free radical scavenging potential using DPPH assay. The "Table 2" and "Figure 2" showed the IC<sub>50</sub> (the test solution concentration required to increase the absorbance of a sample by 50% comparing to the blank solution) for different medicinal plants in different extracts. The results showed that ethanolic extracts of these medicinal plant extracts

showed the higher level of free radical scavenging or antioxidant properties, followed by methanolic extracts in comparison with the  $IC_{50}=37.337\mu\text{g/ml}$  of standard ascorbic acid. The ethanolic and methanolic extracts *Euphrasiae stricta* L. showed the highest antioxidant potential of  $38.972\mu\text{g/mL}$  and  $43.665\mu\text{g/mL}$  respectively followed by the *Euphorbia platyphyllos* L. ( $40.817\mu\text{g/mL}$  &  $42.988\mu\text{g/mL}$ ) and *Epimedium brevicomum* Maxim ( $46.265\mu\text{g/mL}$  &  $51.249\mu\text{g/mL}$ ) as compare to the Ascorbic acid  $IC=37.337\mu\text{g/mL}$ . The aqueous extracts showed almost similar results for all samples regarding %age inhibition of free radicals.

Thus, these medicinal plants with the higher antioxidant potentials can be efficiently used as an efficient source of natural antioxidants to treat various oxidative stress related problems like cancer and other cardiovascular disorders. A quality control protocol may also be designed by following this study obtained by DPPH assay method and might be useful to develop an efficient protocol to investigate the antioxidant, anticancer or phytochemical activities of traditionally used medicinal plants.

Table 3:Free Radical Scavenging Activity of Medicinal Plant samples using different Extract Solutions.

| Sr. No. | Plant Sample                       | Sample Extracts | Radical Scavenging Activity (RSA) $IC_{50}$ (ug/mL) | R <sup>2</sup> |
|---------|------------------------------------|-----------------|-----------------------------------------------------|----------------|
| 1       | <i>Euphrasiae stricta</i>          | Ethanol         | 38.972                                              | 0.968          |
|         |                                    | Methanol        | 43.665                                              | 0.962          |
|         |                                    | Water           | 110.057                                             | 0.985          |
| 2       | <i>Euphorbia platyphyllos</i> L.   | Ethanol         | 40.817                                              | 0.983          |
|         |                                    | Methanol        | 42.988                                              | 0.979          |
|         |                                    | Water           | 121.512                                             | 0.997          |
| 3       | <i>Epimedium brevicomum</i> Maxim. | Ethanol         | 46.265                                              | 0.978          |
|         |                                    | Methanol        | 51.249                                              | 0.996          |
|         |                                    | Water           | 98.605                                              | 0.981          |
| 4       | <i>Viscum album</i>                | Ethanol         | 52.279                                              | 0.984          |
|         |                                    | Methanol        | 54.463                                              | 0.991          |
|         |                                    | Water           | 141.227                                             | 0.979          |
| 5       | <i>Psoralea corylifolia</i> L.     | Ethanol         | 51.821                                              | 0.988          |
|         |                                    | Methanol        | 52.665                                              | 0.995          |
|         |                                    | Water           | 124.134                                             | 0.999          |
| 6       | <i>Equiseti arvense</i>            | Ethanol         | 55.246                                              | 0.958          |
|         |                                    | Methanol        | 58.781                                              | 0.993          |
|         |                                    | Water           | 128.427                                             | 0.983          |
| 7       | <i>Veronica officinalis</i>        | Ethanol         | 51.594                                              | 0.998          |
|         |                                    | Methanol        | 54.159                                              | 0.983          |
|         |                                    | Water           | 113.361                                             | 0.984          |

|    |                               |          |         |       |
|----|-------------------------------|----------|---------|-------|
| 8  | <i>Artemisia herba</i>        | Ethanol  | 53.036  | 0.954 |
|    |                               | Methanol | 55.514  | 0.996 |
|    |                               | Water    | 107.481 | 0.976 |
| 9  | <i>Fagopyrum cymosum</i>      | Ethanol  | 54.801  | 0.981 |
|    |                               | Methanol | 57.882  | 0.991 |
|    |                               | Water    | 125.838 | 0.981 |
| 10 | <i>Prunella vulgaris</i>      | Ethanol  | 53.667  | 0.985 |
|    |                               | Methanol | 54.531  | 0.996 |
|    |                               | Water    | 104.822 | 0.964 |
| 11 | <i>Hederæ folium</i>          | Ethanol  | 56.797  | 0.982 |
|    |                               | Methanol | 59.797  | 0.998 |
|    |                               | Water    | 109.527 | 0.981 |
| 12 | <i>Salvia Divinorum</i>       | Ethanol  | 60.961  | 0.979 |
|    |                               | Methanol | 65.356  | 0.999 |
|    |                               | Water    | 111.201 | 0.977 |
| 13 | <i>Thymus serpyllum L.</i>    | Ethanol  | 52.559  | 0.996 |
|    |                               | Methanol | 57.329  | 0.994 |
|    |                               | Water    | 134.297 | 0.972 |
| 14 | <i>Melissæ officinalis</i>    | Ethanol  | 51.768  | 0.952 |
|    |                               | Methanol | 59.436  | 0.997 |
|    |                               | Water    | 59.436  | 0.995 |
| 15 | <i>Cassia tora L.</i>         | Ethanol  | 54.768  | 0.991 |
|    |                               | Methanol | 58.971  | 0.998 |
|    |                               | Water    | 149.891 | 0.982 |
| 16 | <i>Saussurea lappa</i>        | Ethanol  | 55.289  | 0.988 |
|    |                               | Methanol | 58.978  | 0.999 |
|    |                               | Water    | 112.452 | 0.995 |
| 17 | <i>Epilobium parvifolium</i>  | Ethanol  | 57.381  | 0.982 |
|    |                               | Methanol | 59.831  | 0.999 |
|    |                               | Water    | 116.097 | 0.994 |
| 18 | <i>Satureja montana</i>       | Ethanol  | 57.335  | 0.991 |
|    |                               | Methanol | 61.972  | 0.996 |
|    |                               | Water    | 113.874 | 0.987 |
| 19 | <i>Asperula odorata</i>       | Ethanol  | 64.561  | 0.973 |
|    |                               | Methanol | 66.287  | 0.974 |
|    |                               | Water    | 117.113 | 0.988 |
| 20 | <i>Gunnera perpensa</i>       | Ethanol  | 57.705  | 0.987 |
|    |                               | Methanol | 59.522  | 0.998 |
|    |                               | Water    | 144.375 | 0.974 |
|    | <i>Fritillaria thunbergii</i> | Ethanol  | 55.551  | 0.997 |

|    |                                      |          |         |       |
|----|--------------------------------------|----------|---------|-------|
| 21 |                                      | Methanol | 58.624  | 0.998 |
|    |                                      | Water    | 123.577 | 0.977 |
| 22 | <i>Melissa flava</i>                 | Ethanol  | 52.658  | 0.987 |
|    |                                      | Methanol | 54.856  | 0.999 |
| 23 | <i>Ocimum basilicum</i>              | Water    | 114.268 | 0.982 |
|    |                                      | Ethanol  | 58.759  | 0.984 |
| 24 | <i>Achillea millefolium</i>          | Methanol | 60.446  | 0.999 |
|    |                                      | Water    | 91.913  | 0.986 |
| 25 | <i>Urticae folium</i>                | Ethanol  | 57.279  | 0.979 |
|    |                                      | Methanol | 58.336  | 0.981 |
| 26 | <i>Polygonum aviculare</i>           | Water    | 118.324 | 0.998 |
|    |                                      | Ethanol  | 51.986  | 0.996 |
| 27 | <i>Lonicera japonica Thunb.</i>      | Methanol | 53.122  | 0.997 |
|    |                                      | Water    | 126.186 | 0.991 |
| 28 | <i>Tinospora cordifolia (Willd.)</i> | Ethanol  | 57.452  | 0.994 |
|    |                                      | Methanol | 62.838  | 0.998 |
| 29 | <i>Paris polyphilla</i>              | Water    | 132.052 | 0.979 |
|    |                                      | Ethanol  | 66.194  | 0.992 |
| 30 | <i>Mentha piperita folium</i>        | Methanol | 82.037  | 0.991 |
|    |                                      | Water    | 123.601 | 0.969 |
| 31 | <i>Tephrosia purpurea L.</i>         | Ethanol  | 50.966  | 0.989 |
|    |                                      | Methanol | 53.372  | 0.998 |
| 32 | <i>Marrubium vulgare</i>             | Water    | 127.955 | 0.991 |
|    |                                      | Ethanol  | 55.081  | 0.979 |
| 33 | <i>Lantana camara</i>                | Methanol | 56.098  | 0.997 |
|    |                                      | Water    | 137.321 | 0.999 |
| 34 | <i>Betulae folium</i>                | Ethanol  | 51.739  | 0.995 |
|    |                                      | Methanol | 52.919  | 0.999 |
| 35 |                                      | Water    | 120.492 | 0.986 |
|    |                                      | Ethanol  | 50.955  | 0.981 |
| 36 |                                      | Methanol | 54.951  | 0.999 |
|    |                                      | Water    | 117.435 | 0.981 |
| 37 |                                      | Ethanol  | 55.541  | 0.998 |
|    |                                      | Methanol | 65.398  | 0.997 |
| 38 |                                      | Water    | 113.849 | 0.983 |
|    |                                      | Ethanol  | 51.546  | 0.992 |
| 39 |                                      | Methanol | 53.722  | 0.992 |
|    |                                      | Water    | 131.394 | 0.983 |
| 40 |                                      | Ethanol  | 52.297  | 0.991 |
|    |                                      | Methanol | 56.297  | 0.991 |



|    |                             |          |         |       |
|----|-----------------------------|----------|---------|-------|
|    |                             | Water    | 129.645 | 0.999 |
| 35 | <i>Teraxaci folium</i>      | Ethanol  | 57.496  | 0.989 |
|    |                             | Methanol | 61.474  | 0.998 |
|    |                             | Water    | 117.948 | 0.985 |
| 36 | <i>Rubi idaei folium</i>    | Ethanol  | 58.889  | 0.988 |
|    |                             | Methanol | 63.138  | 0.999 |
|    |                             | Water    | 110.017 | 0.995 |
| 37 | <i>Hedyotis diffusa</i>     | Ethanol  | 54.642  | 0.987 |
|    |                             | Methanol | 58.837  | 0.999 |
|    |                             | Water    | 121.351 | 0.989 |
| 38 | <i>Smilax glabra</i> Roxb   | Ethanol  | 56.638  | 0.994 |
|    |                             | Methanol | 60.301  | 0.998 |
|    |                             | Water    | 109.511 | 0.999 |
| 39 | <i>Trifolium repense</i> L. | Ethanol  | 52.734  | 0.998 |
|    |                             | Methanol | 56.442  | 0.999 |
|    |                             | Water    | 123.492 | 0.973 |
| 40 | <i>Cantaurii herba</i>      | Ethanol  | 52.487  | 0.992 |
|    |                             | Methanol | 58.836  | 0.998 |
|    |                             | Water    | 134.361 | 0.981 |
|    | Standard A. Acid            | Methanol | 37.337  | 0.989 |

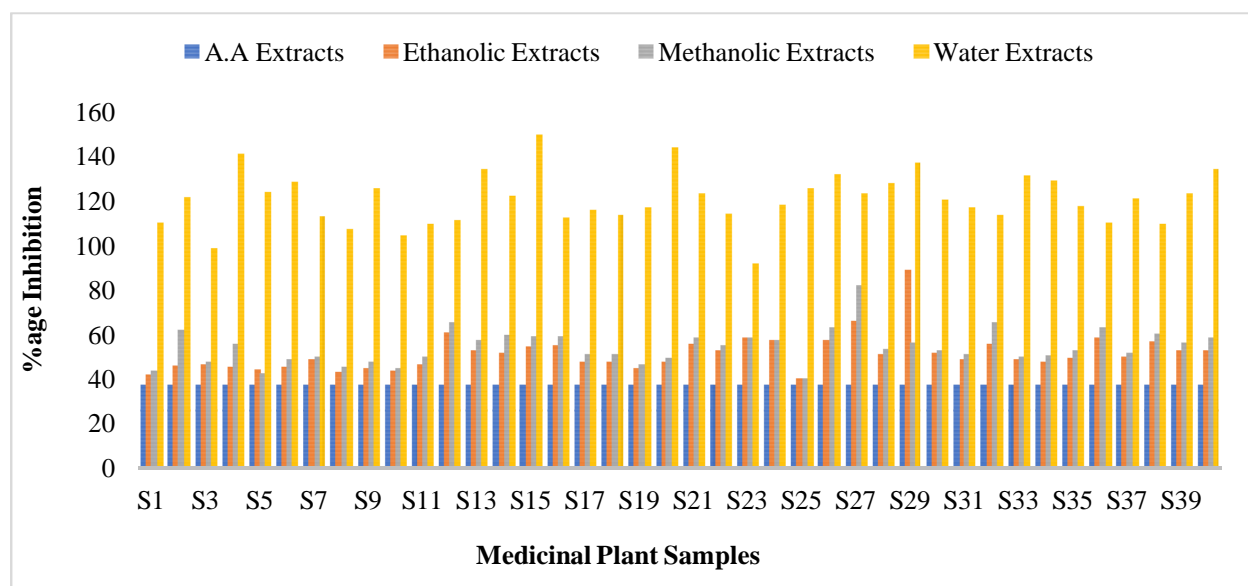

Figure-2: Graphical presentation of Free Radical Scavenging potential of various plant extracts of various Medicinal plant samples in comparison with Ascorbic Acid.

The *Euphrasiae stricta* plant was investigated for its antioxidant potentials in this research. It is an important medicinal plant in South Asia. Antioxidant assay was performed in

various solvent systems, i.e., water, ethyl ether, 70% ethanol and 80% methanol. The highest total phenol content were shown by the methanol extracts among all the extracts; so, these were used for additional research. To evaluate the antioxidant potential of these methanolic extracts various antioxidant assays were used like DPPH, metal ion chelating assay and FRAP Assay. Antibacterial activity and superoxide radical anions were taken as parameters. The antioxidant potential in the methanol extracts of *E. Stricta* sheets was comparable with strong antioxidants previously exploited and largely dependent on concentration<sup>[17]</sup>.

The *Luphorbia platyphylos* L. (Euphorbiaceae) was investigated to verify the potential radical scavenging properties in its methanolic, petroleum ether, water, ethyl acetate and diethyl ether extracts using DPPH, DNA and cytotoxic activity in extracts of MCF-7 breast cancer cells from test excretion test exclusions assay DPPH trypan blue exclusion, Hoechst 33258 and comet assay double staining with iodide propidium, respective. From this study it was observed that all extracted samples showed a dose-response relation. Moreover, this study also showed that antioxidant properties were possessed by various extracts of *E. platyphylos* which caused DNA fragmentation. These results also proved that the breast cancer can be treated by using this plant as a potential source of anticancer agent. Further studies are needed to isolate and identify individual phenolic compounds in extracts<sup>[18]</sup>.

The *E. pinnatum* extracts were evaluated to measure the total phenol content (TPC) and total flavonoids contents (TFC) through spectrophotometry methods. The higher antioxidant and antimicrobial activity was observed by the methanolic extract as compared to the ethanolic or water extracts. The methanol extract also showed high value of (149 and 36.6 mg /g) for TPC and TFC of *E. pinnatum* extracts. The ethanolic extracts showed antioxidant potential of (137.2) and 19.5 mg/g) followed by (86.2 and 8.4 mg /g) of water extracts. The lower IC value of 200 µg /mL was shown by methanolic extracts and then the (250 µg /mL) and (400 µg /mL) of ethanol and water extracts respectively. It was observed that there was a positive correlation found amongst antioxidant, antimicrobial activity, TPC and TFC in *E. pinnatum* extracts<sup>[19]</sup>.

The potential antioxidant properties of methanol extracts of *Viscum album* ssp. (mistletoe) were investigated by using the 1.1-diphenyl-2-picrylhydrazyl (DPPH) assay to check the radical scavenging potential, FRAP and thiobarbituric acid were used to testify the lipid peroxidation inhibitory effect. The maximum activity was shown by the mistletoe extract grown in the lime tree in summer. It was also observed that harvest time and host tree had great influence on the plant's antioxidant capacity<sup>[20]</sup>.

The ethanol extracts of *Psoralea corylifolia* seeds was studied for detection of their phytochemical properties. The total flavonoids and polyphenols were studied to check the presence of polyphenols. To determine the antioxidant activity 1.1-diphenyl-2-picrylhydrazyl (DPPH) assay and superoxide radical assay were used. The concentrations of flavonoids and ethylene derivatives of polyphenol *Psoralea semicorylifolia* 60.63 QE mg/g and 74.35 mg/g respectively. The stronger antioxidant activity was shown by the extracts with a lower value of

IC<sub>50</sub> for DPPH and the elimination of superoxide. The value of IC<sub>50</sub> for DPPH and removal of phosphorus oxide was 166.61 mg/mL and 177.69 mg/mL, respectively. The strongest antioxidant activity of ethanolic extract was observed to be due to presence of flavonoids and phenols [21].

The antioxidant effects of different extracts of the *Equisetum arvense* L. (horse tail) were studied by using various antioxidant assays during lipid peroxidation of lipid particles. Antidepressant activity was studied in the human tumor cells of HLA, HT-29 and MCF7 using the sulforodamine B assay. It was confirmed from the analysis of these results that the ESR extracts suppress the formation of both lipid peroxidic roots and the investigation of adjuvant dosing systems. The results indicated that the extracts of ethyl ether, methanol, butanol and water extracts have been very effective in removing radical peroxigens. These findings showed that the *Equisetum arvense* extracts are a significant basis of voluntarily accessible accepted antioxidants and latent phytochemicals source [22].

The *V. teucrium* L., *V. officinalis* L. and *V. Orchidia* L. family *Plantaginaceae* were the three species tested for their potential phenolic, sterolic, antioxidant and antimicrobial activities. The quantification and identification of phenol compounds and other phytosterol were calculated using the p-coumaric and LC/MS techniques, folic acid, luteolin, and cytosterol acid the main components. More than this, Hesperdolina, Yupatorean and Epatoline were first discovered in the genus Veronica. However, the content of the phytosterol of most of the Veronica genus were not examined. Antioxidant potentials that were examined through Trolox (TEAC) and EPR antioxidant assays showed that the *V. officinalis* and *V. Orchidea* showed comparable antioxidant potentials, while *V. Teucrium* extracts were recorded for lower values. These findings can be helpful promote the best use of genus Veronica as antioxidants and antimicrobial source [23].

The *Artemisia alba* herba (AHA) was tested for its potential antioxidant activity of its extracts by using the self-protective effect of powder against oxidation induced by alkanes in diabetic mice. The four groups were designed for mice random division: the first group receiving control of a saline solution of 9%, the second group 150 mg of alloxan was used to treat with administered peritoneal. The 400 mg of AHA / kg (body weight) was used treat the third group of mice while Aloxan and AHA were to treat the Group IV animals. The management of AHA aquatic extraction improved these criteria. These results indicated that AHA improves oxidative damages, hyperlipidemia and hyperglycemia in alloxan-induced diabetes in mice [24].

Three different types of buckwheat Spp. like *Fagopyrum cymosum*, *Fagopyrum tataricum* and *Fagopyrum esculentum* were tested for their anti-oxidant and antimicrobial potentials of volatile oils (VOs) extracts from their flowers. The hydro-distillation was used to obtain VOs of fresh buck wheat flowers and to analyze the chemical composition of extracts gas chromatography-mass spectrometry (GC-MS) was used. A remarkable antioxidant capacity of IC<sub>50</sub>= 353.15 mg /mL, 264.92 gm /mL and 210.63 gm /mL from the 1,1-dichenylyl 2-pycryl hydrazil (DPPH) measured as 174.13 g/mL, 243.16 gm/mL and 216.11 mg/mL, respectively was also shown by the VOs extracts from *F. cymosum*, *F. esculentum* and *F.tataricum* flowers, when

$\beta$ -carotene-linoleic bleaching method was applied. Thus, the finding showed that the buckwheat flowers Vos extracts can be effectively used as natural antioxidants and antimicrobial agents <sup>[25]</sup>.

The *Prunella vulgaris* Linn (*P. vulgaris*) was investigated for its antioxidant activity of several water-soluble polysaccharides extracts by using the DEAE-Sepharose flow column for different rinsing water (PV-P1), 0.2 M NaCl (PV-P3) and NaCl 0.1 M (PV-P2). As compared to PV-P2 and PV-P3A the higher degree of branching and a higher molecular weight was shown by Structural analysis of PV-P1. The all three extracts PV-P1, PV-P2 and PV-P3 against RA 264.7 in the tested concentrations no cellular toxicity was observed. So, it was shown by that common *P. vulgaris* polysaccharides can be inspected as possible antioxidant source, medicine, immunoglobulins or functional foods <sup>[26]</sup>.

The antioxidant activity various extracts of dried *Polygonum aviculare* L. was investigated by using various assays by FRAP assay, lipid peroxidation and analysis of DNA-induced cleavage sequences. The IC<sub>50</sub> value was measured by the results for different extracts which was 50  $\mu\text{g}/\text{mL}$ , 0.9  $\mu\text{g}/\text{mL}$  and 15  $\mu\text{g}/\text{mL}$  for the DPPH antioxidant or radical scavenging assay, H<sub>2</sub>O<sub>2</sub> superoxide radical assay and for lipid-peroxidation assay, respectively. Moreover, these extracts also showed a protective effect in hydroxyl radical-induced DNA strand assays. The value of TPC and TFC observed were 677.4  $\pm$  52.7  $\mu\text{g}/\text{g}$  and 122.7  $\pm$  14  $\mu\text{g}/\text{g}$  for these extracts. So, the significant antioxidant effects were shown by these findings of *Polygonum aviculare* L. extract <sup>[27]</sup>.

Various species of Salvia medicinal plant e.g., *Salvia macrosiphon*, *Salvia sahendica*, *Salvia chloroleuca*, *Salvia xanthocheila*, *Salvia hydrangea*, *Salvia atropatana*, *Salvia ceratophylla*, *Salvia sclarea* and *Salvia glutinosa* species were evaluated for their antiproliferative and antioxidant potentials. The phytochemical properties, TPC and TFC were also observed. The highest antioxidant activity of IC<sub>50</sub>= 8.20  $\text{mg}^{-1}$  by *S. ceratophylla* was shown against C32 cells followed by *S. glutinosa* with an IC<sub>50</sub> value of 5.29  $\text{mg}^{-1}$  compared with ACHN cell lines. However, the *S. glutinosa* also showed higher uptake activity for DPPH roots with IC 50 than 3.2  $\mu\text{g}^{-1}$ . The highest concentration of phenol and total flavonoids were shown by these species. So, these results specified the importance of salvia species as healthy plant foods <sup>[28]</sup>.

The organo and thyme extracts were evaluated for their antioxidants effects in soybean oil is susceptible using thermal oxidation. About 3000 mg/kg of organo, thyme olese oil and their mixtures was found in Soybean oil, it also contains tributyl hydroquinone (TBHQ; 50 mg / kg) and soybean without oil exposed to thermal oxidation. Thus, physical, chemical and fatty acids were evaluated. A greater protective effect was applied by organo and thyme separately, which prevented the increase in the formation of TBHQ, showing that by adding of 3000 mg / kg ensures better protection against oxidative oxidation. The increased absorption of urea by adding the thyme and oregano extracts gave a greater protective effect <sup>[29]</sup>.

The antioxidant potentials of various new plant like (*V. rhodopaea* L., *Veronica bellidioides* L., *V. bccabunga* L., *V. kellereri*, *V. Vindobonensis*, *V. austriaco*, *Clinopodium vulgare* L., *Stachysrecta* L., *Xeranthemum annuum* L. and *Clematis vitalba* were investigated in this research. The potential of antioxidants for new varieties comparable to plants reference drugs. This study showed the antioxidant potential and importance of various traditionally used medicinal plant species<sup>[30]</sup>.

The antioxidant potentials of *C. tora* L. aqueous extracts were investigated in this study. It was noted that at a dose of 0.2 mg / mL, the *C. tora* (unroasted) showed 94% hang-up of linoleic acid peroxidation even greater than the alpha-tocopherol (82%). The roasting of water extracts of *C. tora* L. was achieved at 200 ° C for 5 minutes and 175 ° C for 5 minutes with inhibition of linoleic acid peroxidation results of 82% and 83%, respectively. The WEUCT-IC<sub>50</sub> value was higher in the lipid formulations caused due to fenton reaction as 0.41 mg /mL, as compared to alpha tocopherol (IC<sub>50</sub>) value of 0.55 mg/mL). Moreover, in the non-enzymatic and enzymatic systems of oxidization system, WEUCT also demonstrated a good anti-oxidant activity. The roasted *C. tora* L. aqueous extracts showed the high degree of staining resulting from coloring compared to the non-roasted sample<sup>[31]</sup>.

The two local medicinal plant species *Saturja montana* L. and *S. subspicata* L. were investigated for eight potential phenolic components (p-coumaric, quercetin, rutin, protocatehúic, caffeine, rosmarinic, ellagic and jeringic acid). The HPLC of ethanolic and methanolic extracts was also measured. The chelating and radical-scavenging assays were used, and the results indicated that the polyphenols and other antioxidant compounds were possessed by both species. A wide range of antimicrobial activity was also observed for various microbial species tested *in-vitro* like (*Candida albicans*, *C. krusei*, *Microsporum gypseum*, *C. dubliniensis*, *C. glabrata*, *Staphylococcus aureus*, *C. parapsilosis* and *Escherichia coli*) by the extracts from both species<sup>[32]</sup>.

The antimicrobial and antioxidant potentials of *Satureja montana* L. against seven species of bacteria were assessed here. It was observed that against *Salmonella typhimurium*, the ethanolic extracts were not effective and also no antibacterial activity was shown by water extracts. The main volatile components of essential oils were the thymol (141 g/L), carvacrol (306 g/L) and methyl ether (63 g /L) of these tested extracts. The hot water extracts of *S. montana* showed the strongest antioxidant capacity and also the essential oil with highest percentage of phenol of plant was measured. So, by these findings it was observed that the *S. montana* can be used as an efficient biologically active extract as natural antioxidants and antimicrobial source<sup>[33]</sup>.

The antioxidant potentials of various extracts of *Galium odoratum* L. were evaluated in this study. The DPPH free radical scavenging assay was used to measure antioxidant potential of these extracts. The water extract were relatively better in Wound reduction and tissue standards (90.68 ± 6.13%, 97.18 ± 4.37% for water extracts 15% and 30% compared to 79.29 ± 9.16% and



91.94 ± 4.14% for 15% and 30% methanol extracts Respectively). The substantial antioxidant potential was noticed with IC<sub>50</sub>=148 µg/mL and 83 µg/mL, for both methanol and aqueous extracts respectively, in the DPPH test. So, assumption was that both extractors have the potential antioxidant potential, as well as empirically and surgically demonstrated the relatively well-burned wound healing activity in the water extract <sup>[34]</sup>.

The *Thymus serpyllum* L. was evaluated in this research for its total phenol content, antioxidant capacity of flavonoids, free radicals and potential effects of high blood pressure were studied for the water extract. The total phenol contents in TPC were measured as 2008.34 ± 10.5mg / L from GAE, and the rosmarinic and caffeic acids were the major phenolic compounds. The absorption activity of nitrogen oxide in vitro was 1 mg / 1 TE 63.43% showing an IC<sub>50</sub> value of 124.40 µg/mL. It was noticed that in all experimental mice, after treatment with TE the heart index was same. No significant activity was shown by the dose given by TE in the uptake of nitric oxide in vivo. It was suggested by these results that TE can be used as antioxidant and also to protect from hyper-tension <sup>[35]</sup>.

Almost 70 medicinal plant extracts were experimented for evaluation of their antioxidant potential and total phenol content (TPC). For human consumption infusions were prepared like tea. Folin-Ciocalteu test was applied to measure the TPC (total phenol contents) of the extracts. FRAP (Ferric Reducing Antioxidant Power) assay was followed to testify the total antioxidant potentials of these extracts. This medicinal plants infusion showed the total phenolic contents values in ranges from 10 to 2016 mg/L. The antioxidant activity was in range of 0.18 to 26 mm /L FRAP assay. The Phenolic of *M. folium* were highly effective ABTS free radical scavengers when compared to vitamin C and Trolox. Finally, from these findings the importance of *M. folium* can be concluded as a vital source of phenolic and antioxidant as compared to red wine or beverages such as tea <sup>[36]</sup>.

## Conclusion

In this experiment the free radical scavenging activity of various medicinal plant samples was measured using different extracts depending upon the ability to eliminate the free radicals using synthetic DPPH. The reactivity of different compounds with the stable free radicals was because of the odd number of electrons present in them. The results showed that ethanolic extracts of different medicinal plant samples have the higher level of free radical scavenging or antioxidant activity, followed by methanolic extracts comparing to the IC<sub>50</sub>=37.337µg/mL value of the ascorbic acid(standard). The highest absorbance was observed in the *Euphrasiae stricta* (IC<sub>50</sub>= 38.972 µg/mL), *Euphorbia platyphyllos* L. (IC<sub>50</sub>= 40.817 µg/mL) and *Epimedium brevicomum* Maxim (IC<sub>50</sub>= 46.265µg/mL), medicinal plants for both of their ethanolic and methanolic extracts. The total antioxidant potential of these medicinal plants was because of high amount of polyphenol and other phytochemical components found in them. The aqueous extracts showed almost similar and comparable results for all samples regarding free radical scavenging activity comparing with the Ascorbic acid. These finding also indicated that all tested medicinal

plants samples likely to possess significant level of free radical scavenging activity although comparatively less than standard ascorbic acid. So, this research suggested that all medicinal plants and particularly *Euphrasia stricta*, *Euphorbia platyphyllos L* and *Epimedium brevicomum* Maxim possess a significant antioxidant potential and can be efficiently applied as an important antioxidant source for the treatment and inhibition of widely spreading oxidative stress related degenerative diseases like cancer, cardiovascular & inflammatory joint disorders, atherosclerosis, dementia, diabetes, asthma and eyes related degenerative diseases etc.

**Disclaimer:** None.

**Ethical statement:** No data was collected from human subjects directly by the author, however, the research was conducted in adherence to the Declaration of Helsinki.

**Competing interest:** The author declare that they have no known competing financial interests or personal relationships that could have appeared to influence the work reported in this paper.

**Source of funding:** I declared that this study had not received any financial aid from the government or any non-government organization.

**Authors Contribution:** Conceptualization, data handling, data analysis, provision of study materials and equipment: HY; Experiments design, study validation, supervision and project administration: HY; Data presentation, draft preparation, study consultation, writing and reviewing: HY.

## REFERENCES

1. Kontoghiorghe GJ and Kontoghiorghe CN. Prospects for the introduction of targeted antioxidant drugs for the prevention and treatment of diseases related to free radical pathology. Expert opinion on investigational drugs. 2019, 28(7): 593-603.
2. Xu DP, Li Y, Meng X, Zhou T, Zhou Y, Zheng J, Zhang JJ and Li HB. Natural antioxidants in foods and medicinal plants: Extraction, assessment and resources. International journal of molecular sciences. 2017, 18(1): 96.
3. Wang Y, Chun OK, Song WO. Plasma and dietary antioxidant status as cardiovascular disease risk factors: a review of human studies. Nutrients. 2013, 5(8): 2969-3004.
4. Shrivastava A, Aggarwal LM, Mishra SP, Khanna HD, Shahi UP and Pradhan S. Free radicals and antioxidants in normal versus cancerous cells-An overview. Indian Journal of Biochemistry and Biophysics (IJBB). 2019, 56(1): 7-19.
5. Garbi MI, Kabbashi AS, Osman EE, Dahab MM, Koko WS and Ahmed IF. Antioxidant activity and phytochemical screening of methanolic leaves extract of *Bauhinia rufescens* (Lam). International Invention Journal of Biochemistry and Bioinformatics. 2015; 3(3): 27.

6. Speakman J and Selman C. The free radical damage theory: accumulating evidence against a simple link of oxidative stress to ageing and lifespan. *Bioessays*. 2011, 33(4): 255-9.
7. Miguel MG. Betalains in some species of the Amaranthaceae family: A review. *Antioxidants*. 2018, 7(4):53.
8. Palacios I, Lozano M, Moro C, Darrigo M, Rostagno MA, Martínez JA, García-Lafuente A, Guillamón E and Villares A. Antioxidant properties of phenolic compounds occurring in edible mushrooms. *Food Chemistry*. 2011, 128(3):674-8.
9. D'souza JJ, D'souza PP, Fazal F, Kumar A, Bhat HP and Baliga MS. Anti-diabetic effects of the Indian indigenous fruit *Emblica officinalis* Gaertn: active constituents and modes of action. *Food & function*. 2014, 5(4): 635-44.
10. Li Y, Guo B, Wang W, Li L, Cao L, Yang C, Liu J, Liang Q, Chen J, Wu S and Zhang L. Characterization of phenolic compounds from *Phyllanthus emblica* fruits using HPLC-ESI-TOF-MS as affected by an optimized microwave-assisted extraction. *International Journal of Food Properties*. 2019, 22(1):330-42.
11. Madhuri S, Pandey G and Verma KS. Antioxidant, immunomodulatory and anticancer activities of *Emblica officinalis*: an overview. *International Research Journal of Pharmacy*. 2011, 2(8):38-42.
12. Gopa B and Bhatt J, Hemavathi KG. A comparative clinical study of hypolipidemic efficacy of Amla (*Emblica officinalis*) with 3-hydroxy-3-methylglutaryl-coenzyme-A reductase inhibitor simvastatin. *Indian journal of pharmacology*. 2012, 44(2): 238.
13. Thilakchand KR, Mathai RT, Simon P, Ravi RT, Baliga-Rao MP and Baliga MS. Hepatoprotective properties of the Indian gooseberry (*Emblica officinalis* Gaertn): a review. *Food & Function*. 2013; 4(10):1431-41.
14. Uddin MS, Al Mamun A, Hossain MS, Akter F, Iqbal MA and Asaduzzaman M. Exploring the effect of *Phyllanthus emblica* L. on cognitive performance, brain antioxidant markers and acetylcholinesterase activity in rats: promising natural gift for the mitigation of Alzheimer's disease. *Annals of neurosciences*. 2016, 23(4): 218-29.
15. Gulcin I, Elias R, Gepdiremen A, Chea A and Topal F. Antioxidant activity of bisbenzylisoquinoline alkaloids from *Stephania rotunda*: Cepharanthine and fanchinoline. *J Enzyme Inhib Med Chem*. 2010, 25: 44-53.
16. Gopinath SM, Rakesh CK, Murthy TN and Dayananda KS. Preliminary phytochemical evaluation of leaf extracts of *Gymnema sylvestre*, *Phyllanthus amarus*, *Phyllanthus reticulatus* of Siddarabeta, Tumkur district, Karnataka. *International Journal of Pharmacognosy and Phytochemical Research*. 2012, 4(3): 109-11.
17. Akter K, Barnes EC, Loa-Kum-Cheung WL, Yin P, Kichu M, Brophy JJ, Barrow RA, Imchen I, Vemulpad SR and Jamie JF. Antimicrobial and antioxidant activity and chemical characterisation of *Erythrina stricta* Roxb.(Fabaceae). *Journal of ethnopharmacology*. 2016, 185:171-81.

18. Aslanturk SO and Tulay AC. Antioxidant, cytotoxic and apoptotic activities of extracts from medicinal plant *Euphorbia platyphyllos* L. *Journal of Medicinal Plants Research*. 2013, 7(19): 1293-1304.
19. Kazempour N, Hossein H and Mona M. Antimicrobial and antioxidant activity of *Epimedium pinnatum*. *Herbapolonica*. 2014, 59(2): 133-138.
20. Tahirovic A and Basic N. Determination of phenolic content and antioxidant properties of methanolic extracts from *Viscum album* ssp. *album* Beck. *Bulletin of the Chemists and Technologists of Bosnia and Herzegovina*. 2017, 49:25-30.
21. Nabi NG and Mukta S. Phytochemical Screening and Antioxidant Activity of Ethanol Extract of *Psoralea corylifolia* seeds. *UK Journal of Pharmaceutical and Biosciences*. 2017, 5(2): 01-07.
22. Cetojevic SDD, Canadanovic JM, Bogdanovic GM, Djilas SM, Cetkovic GS, Tumbas VT and Stojiljkovic BT. Antioxidative and antiproliferative activities of different horsetail (*Equisetum arvense* L.) extracts. *Journal of Medicine and Food*. 2010, 13(2): 452-459.
23. Mocan A, Vodnar DC, Vlase L, Crișan O, Gheldiu AM and Crisan G. Phytochemical Characterization of *Veronica officinalis* L., *V. teucrium* L. and *V. orchidea* Crantz from Romania and Their Antioxidant and Antimicrobial Properties. *International Journal of Molecular Science*. 2015, 16(9): 21109–21127.
24. Sekiou O, Boumendjel M, Taibi F, Boumendjel A and Messarah M. Mitigating effects of antioxidant properties of *Artemisia alba* herba aqueous extract on hyperlipidemia and oxidative damage in alloxan-induced diabetic rats. *Architecture and Physiological Biochemistry*. 2019, 125(2): 163-173.
25. Zhao J, Jiang L, Tang X, Peng L, Li X, Zhao G and Zhong L. Chemical Composition, Antimicrobial and Antioxidant Activities of the Flower Volatile Oils of *Fagopyrum esculentum*, *Fagopyrum tataricum* and *Fagopyrum Cymosum*. *Molecules*. 2018, 22-23(1):182-186.
26. Li C, Qiang H, Xiong F, Xiu-Jie Y, Rui HL and Li JU. Characterization of antioxidant and immunomodulatory activities of polysaccharides from *Prunella vulgaris* Linn. *International Journal of Biological Macromolecules*. 2015, 75(3): 298–305.
27. Sung YY, Yoon T, Yang WK, Kim SJ, Kim DS and Kim HK. The antiobesity effect of *Polygonum aviculare* L. ethanol extract in high-fat diet-induced obese mice. *Evidence-Based Complementary and Alternative Medicine*. 2013, 1: 345-362.
28. Loizzo M, Morteza A, Peyman S and Rosa T. In-vitro antioxidant and antiproliferative activities of nine *Salvia* species. *Natural Product Research*. 2014, 28(24): 01-08.
29. Jorge N, Carolina MV and Patricia VDR. Antioxidant Effect of Thyme (*Thymus vulgaris* L.) and Oregano (*Origanum vulgare* L.) Extracts in Soybean Oil Under Thermoxidation. *Journal of Food Processing and preservation*. 2015, 39(6): 1399-1406.
30. Nikolova M. Screening of radical scavenging activity and polyphenol content of Bulgarian plant species. *Pharmaceutical Research*. 2011, 3(4): 256–259.

31. Supare S and Patil M. Estimation of phytochemical components from *Cassia tora* and to study its larvicidal activity. *International Journal of Pharmaceutical Science Invention*. 2015; 6(4): 11-6.
32. Kremer D, Kosir IJ, Koncic MZ, Cerenak A, Potocnik T, Srecec S, Randic M and Kosalec I. Antimicrobial and Antioxidant Properties of *Satureja Montana* L. and *S. Subspicata* Vis. (Lamiaceae). *Curriculum Drug Targets*. 2015, 16(14): 1623-33.
33. Serrano C, Matos O, Teixeira B, Ramos C, Neng N, Nogueira J, Nunes ML and Marques A. Antioxidant and antimicrobial activity of *Satureja montana* L. extracts. *Journal of Science, Food and Agriculture*. 2011, 91(9): 1554-60.
34. Kahkeshani N, Farahanikia B, Mahdaviani P, Abdolghaffari A, Hassanzadeh G, Abdollahi M and Khanavi M. Antioxidant and burn healing potential of *Galium odoratum* extracts. *Research in Pharmaceutical Sciences*. 2013, 8(3): 197–203.
35. Mihailovic SN, Belscak CA, Grujic MJ, Ivanov M, Jovovic D, Bugarski D and Miloradovic Z. Antioxidant and antihypertensive activity of extract from *Thymus serpyllum* L. in experimental hypertension. *Plant Foods and Human Nutrition*. 2013, 68(3): 235-40.
36. Ulewicz-Magulska B and Wesolowski M. Total phenolic contents and antioxidant potential of herbs used for medical and culinary purposes. *Plant Foods for Human Nutrition*. 2019, 74(1): 61-7.
